# Supplementary material
Source: ML conference proceedings conference paper supplement (https://openreview.net/forum?id=UuBFviV8Gz)

# Questionnaire Scores by Model

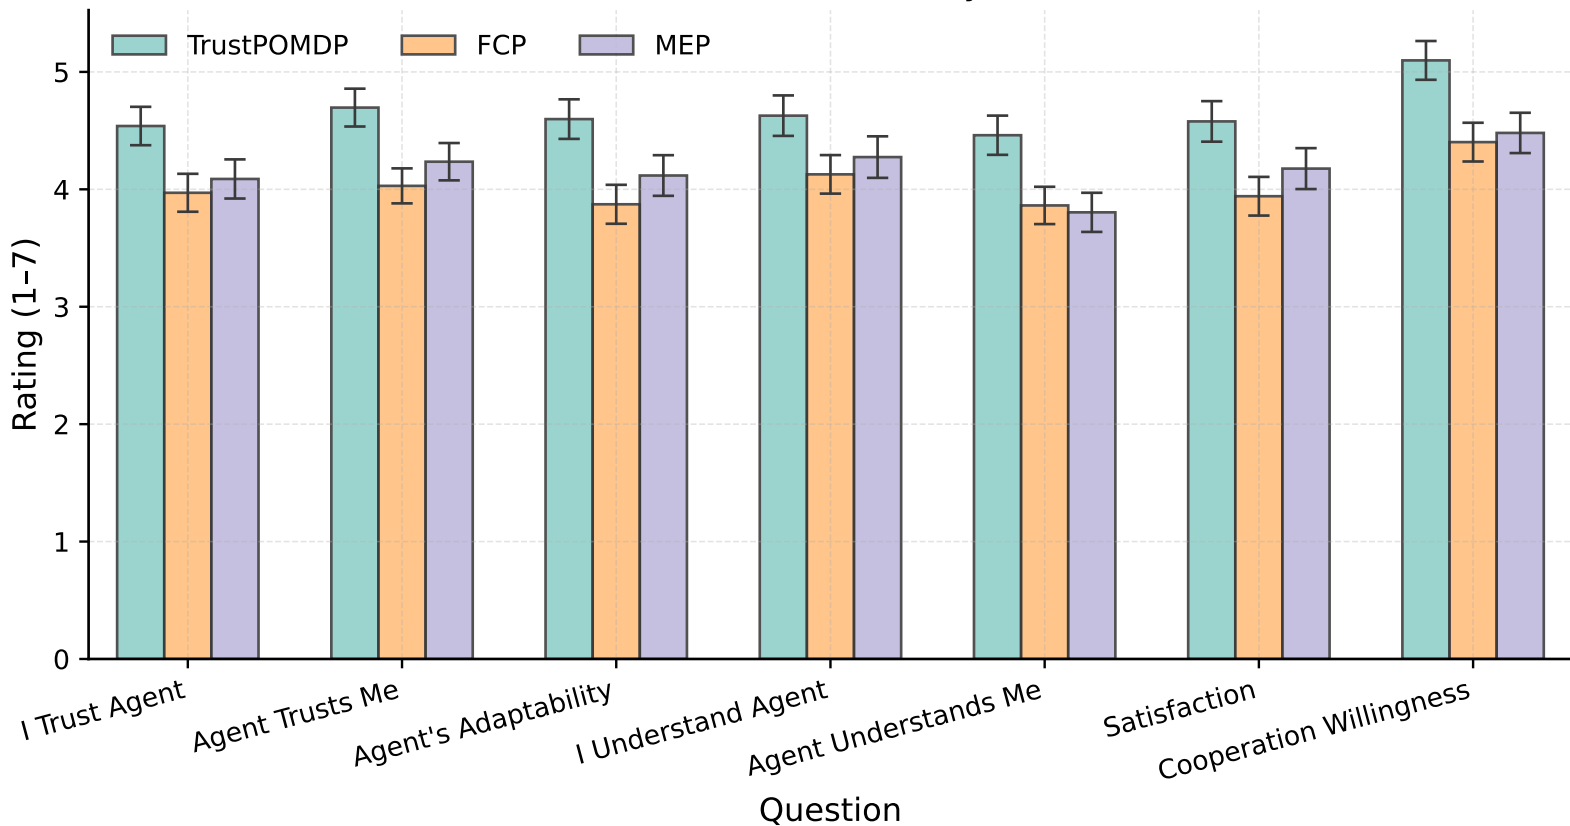

Supplement: supplementary_material [file question_by_model_per_question.pdf › SupplementaryMaterial/TrustPOMDP_project/Human Experiment Data/question_by_model_per_question.pdf]

**(a) Overall Team Reward**

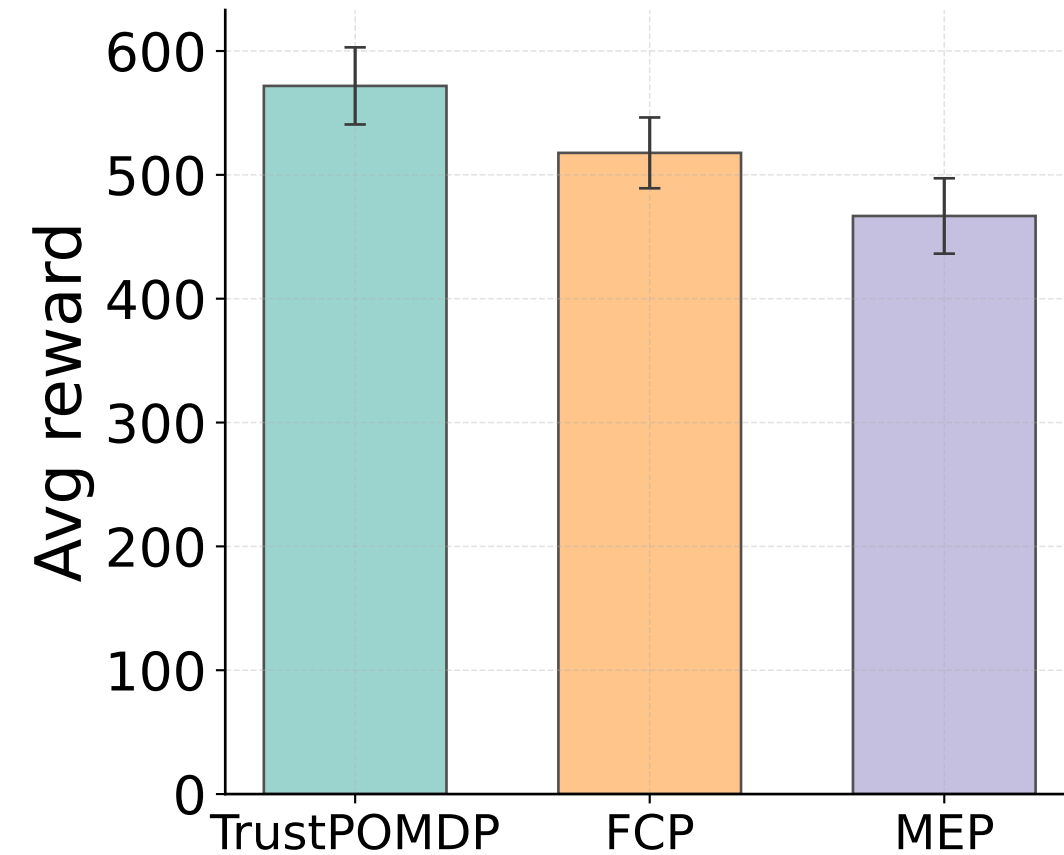

**(b)**

**Humans' Subjective Perception**

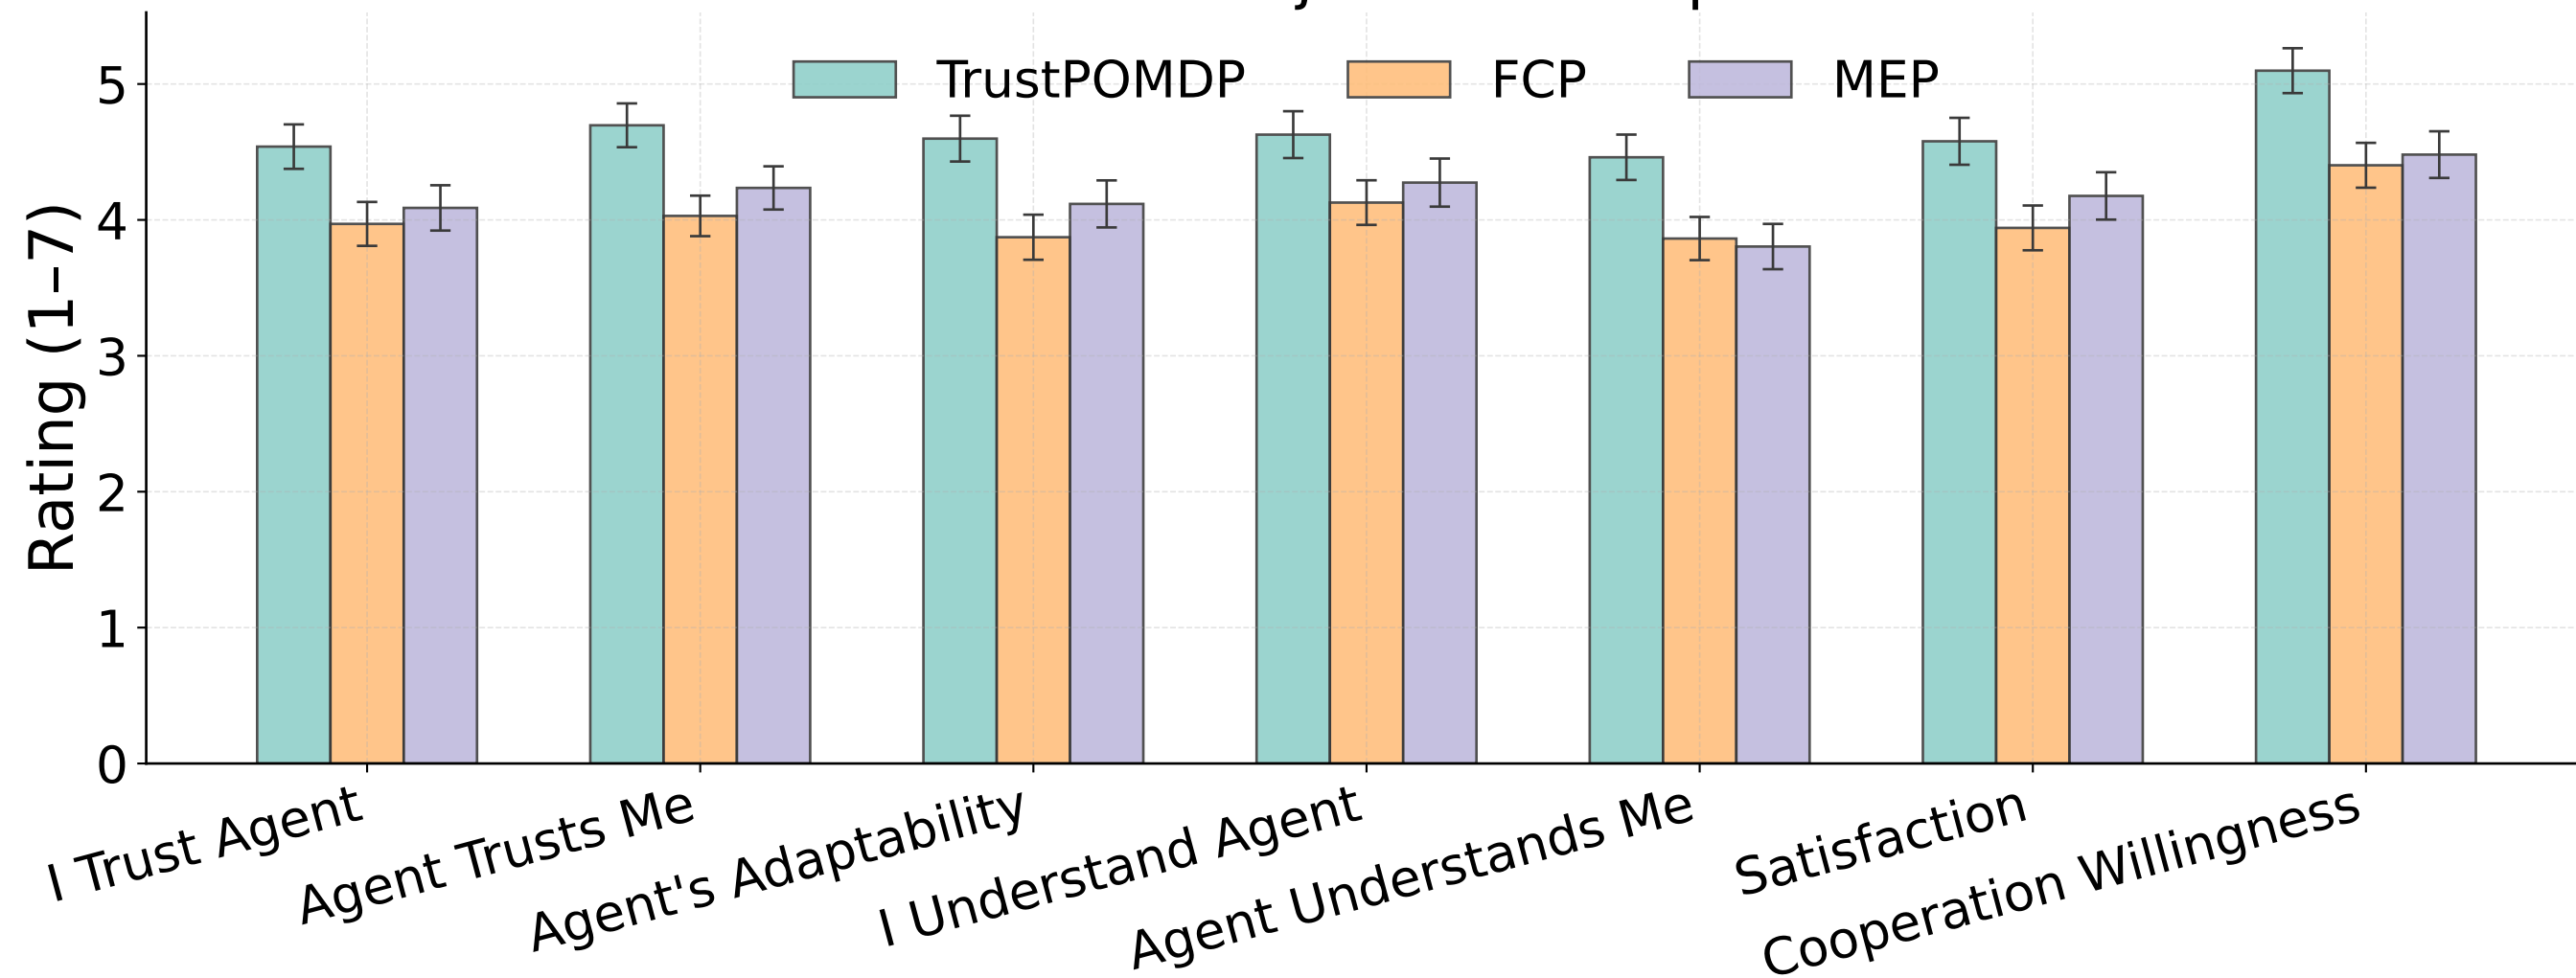

Supplement: supplementary_material [file reward_and_question_combined.pdf › SupplementaryMaterial/TrustPOMDP_project/Human Experiment Data/reward_and_question_combined.pdf]

Reward by Model within each Layout

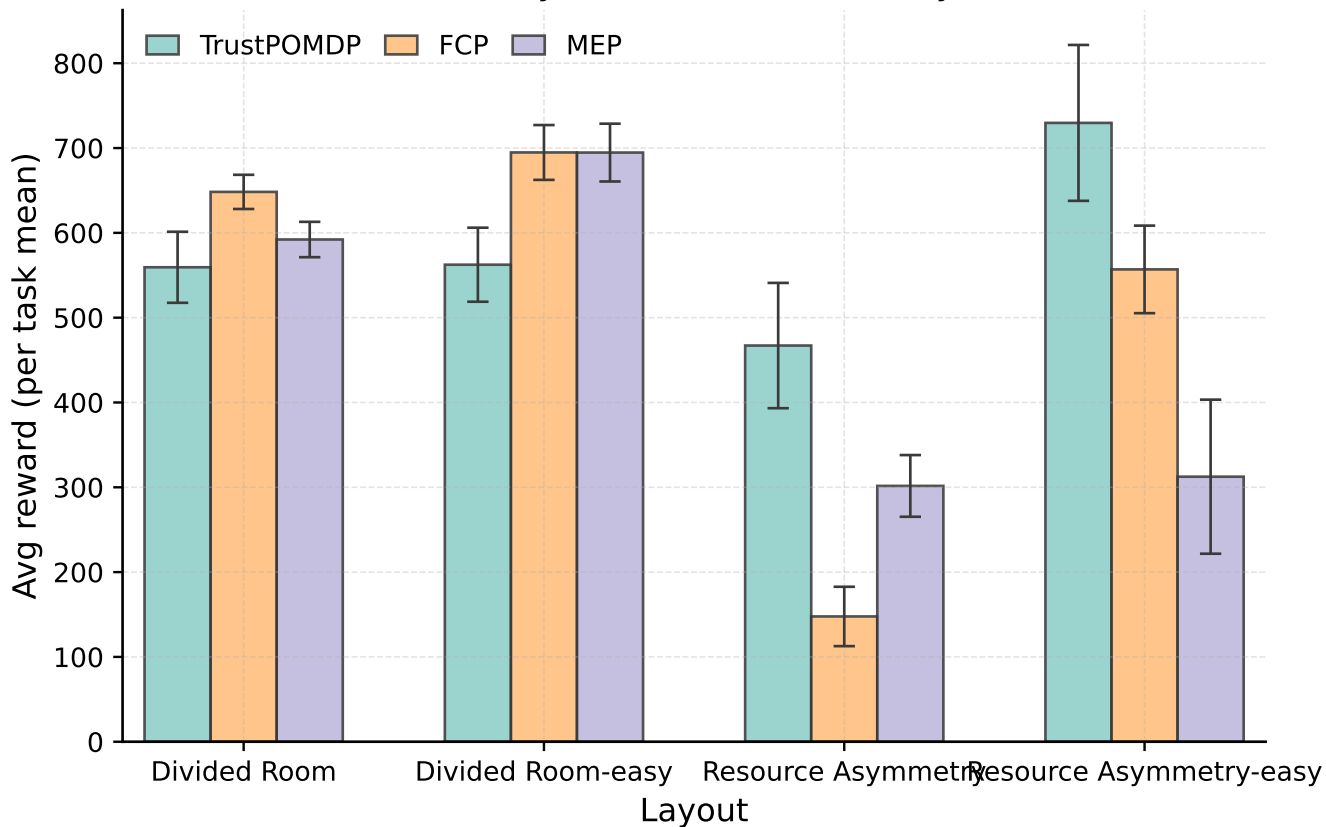

Supplement: supplementary_material [file reward_by_model_by_layout.pdf › SupplementaryMaterial/TrustPOMDP_project/Human Experiment Data/reward_by_model_by_layout.pdf]

Reward by Model (across all layouts)

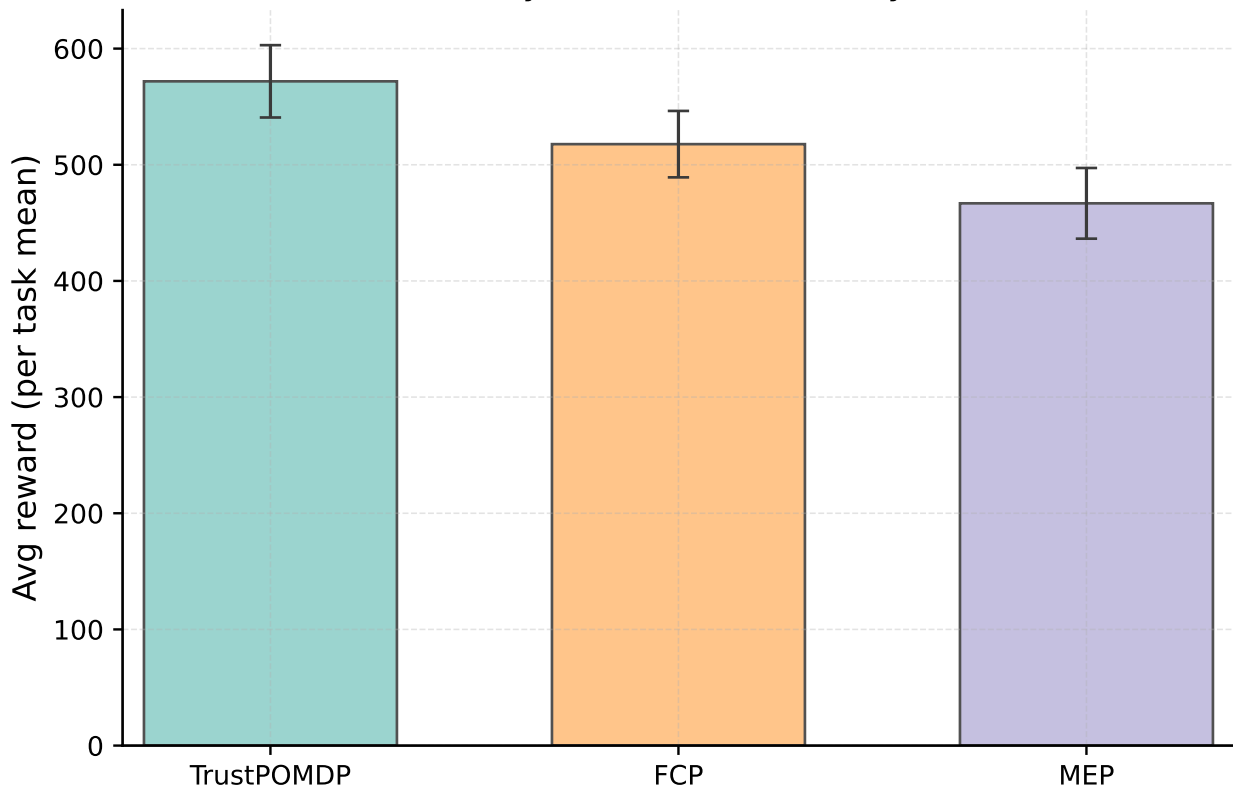

Supplement: supplementary_material [file reward_by_model_overall.pdf › SupplementaryMaterial/TrustPOMDP_project/Human Experiment Data/reward_by_model_overall.pdf]
